# Supplementary material
Source: HighWire-hosted journal article supplement (https://www.jneurosci.org/content/38/13/3230)
Supplement: inline-supplementary-material-2 [file inline-supplementary-material-2.docx]

| ROI | Volume (ICB+) | Volume (ICB-) | *P* |
| --- | --- | --- | --- |
| Caudate | 1191±240 mm3 | 1051±272 mm3 | 0.080 |
| Putamen | 1783±390 mm3 | 1617±324 mm3 | 0.338 |
| Globus Pallidus | 595±100 mm3 | 601±92 mm3 | 0.409 |
| Ventral Striatum | 462±111 mm3 | 451±174 mm3 | 0.428 |
| Amygdala | 752±143 mm3 | 775±165 mm3 | 0.644 |
| Thalamus | 1962±472 mm3 | 2055±563 mm3 | 0.644 |
| Midbrain | 703±152 mm3 | 683±155 mm3 | 0.597 |

**Figure 1-2. Mean ROI volumes.** Mean volumes are listed alongside standard deviations, in mm3. No significant differences were found in structure size between the ICB+ and ICB- groups, indicating that structural volume is unlikely to be a confounding factor.
