# Supplementary material
Source: HighWire-hosted journal article supplement (https://www.jneurosci.org/content/38/13/3230)
Supplement: inline-supplementary-material-7 [file inline-supplementary-material-7.docx]

| **Acquisition Parameter:** | ***ICB+*** | ***ICB-*** | ***Overall Cohort*** |
| --- | --- | --- | --- |
| Break 1 length | 1061±174 sec | 996±232 sec | 1005±187 sec |
| Break 2 length | 972±168 sec | 941±272 sec | 962±221 sec |
| DY2 mean start time: | 5171±174 sec | 5106±232 sec | 5115±187 sec |
| DY3 mean start time: | 9108±265 sec | 9047±447 sec | 9062±364 sec |

**Table 1-2. PET acquisition time parameters.** Acquisition parameters related to DY period start times and break lengths for both groups.
