# Supplementary material
Source: HighWire-hosted journal article supplement (https://www.jneurosci.org/content/38/13/3230)
Supplement: inline-supplementary-material-8 [file inline-supplementary-material-8.docx]

**Table 1-3. Dopamine agonist medication distribution.** The number of individuals prescribed pramipexole, ropinirole, or rotigotine is listed for each group. No other dopamine agonist medications were represented, and no individual was prescribed multiple medications concurrently. No significant differences were found in the distribution of dopamine agonist medications prescribed to the ICB+ and ICB- groups, indicating that treatment differences are unlikely to be a confounding factor.

| Medication | Users (ICB+) | Users (ICB-) | *P* |
| --- | --- | --- | --- |
| Pramipexole | 6 | 5 | 0.69 |
| Ropinirole | 8 | 11 |  |
| Rotigotine | 3 | 2 |  |
